# Supplementary material
Source: PubMed Central journal article supplement (PMC4811730)
Supplement: NIHMS759763-supplement-ONLINE_DATA_SUPPLEMENT.pdf [file NIHMS759763-supplement-ONLINE_DATA_SUPPLEMENT.pdf]

## SUPPLEMENTAL MATERIAL

**Supplemental Table I.** Characteristics of MRI Sub-study participants included and not included in analysis

|                             | Included<br>(N=1,170) | Not Included<br>(N=120) | P-value |
|-----------------------------|-----------------------|-------------------------|---------|
| Age, mean $\pm$ SD          | 70.3 $\pm$ 8.9        | 73.5 $\pm$ 9.0          | 0.0002  |
| Male, n (%)                 | 469 (40.1)            | 41 (34.2)               | 0.21    |
| Race-ethnicity, n (%)       |                       |                         | 0.17    |
| White                       | 170 (14.5)            | 21 (17.5)               |         |
| Black                       | 196 (16.8)            | 27 (22.5)               |         |
| Hispanic                    | 779 (66.6)            | 68 (56.7)               |         |
| Other                       | 25 (2.1)              | 4 (3.3)                 |         |
| Smoking, n (%)              |                       |                         | 0.23    |
| Never                       | 561 (47.9)            | 49 (40.8)               |         |
| Former                      | 504 (43.1)            | 56 (46.7)               |         |
| Current                     | 105 (9.0)             | 15 (12.5)               |         |
| Hypertension, n (%)         | 842 (72.0)            | 94 (78.3)               | 0.14    |
| Diabetes, n (%)             | 269 (23.0)            | 23 (19.2)               | 0.34    |
| Hypercholesterolemia, n (%) | 459 (39.2)            | 47 (39.2)               | 0.99    |
| BMI, mean $\pm$ SD          | 28.5 $\pm$ 5          | 28.2 $\pm$ 5.4          | 0.50    |
| eGFR, mean $\pm$ SD         | 77.4 $\pm$ 20.3       | 75 $\pm$ 20.9           | 0.35    |
| FGF23, mean $\pm$ SD*       | 88.8 $\pm$ 119.2      | 72.4 $\pm$ 49.5         | 0.55    |
| PO4, mean $\pm$ SD          | 3 $\pm$ 0.5           | 2.9 $\pm$ 0.6           | 0.66    |
| PTH, mean $\pm$ SD*         | 56.9 $\pm$ 26.3       | 43.7 $\pm$ 11.4         | 0.09    |

\* t test was based on unadjusted log-transformed data

---

**Supplemental Table II. Sensitivity Analyses**

|                  | FGF23 level | Model 3a           |       | Model 3b          |       |
|------------------|-------------|--------------------|-------|-------------------|-------|
|                  |             | Beta (95% CI)      | P     | Beta (95% CI)     | P     |
| WHMV,<br>1/TCV%* | per lnFGF23 | 0.14 (0.05, 0.23)  | 0.003 | 0.14 (0.05, 0.23) | 0.002 |
|                  |             | p for trend =0.04  |       | p for trend =0.02 |       |
|                  |             | OR (95% CI)        | P     | OR (95% CI)       | P     |
| SBI              | per lnFGF23 | 1.22 (0.89, 1.66)  | 0.23  | 1.22 (0.90, 1.67) | 0.20  |
|                  |             | p for trend = 0.14 |       | p for trend =0.12 |       |

\* log-transformed

WMHV=white matter hyperintensity volume; SBI=MRI-defined subclinical infarction

Model 3a: adjusted covariates in model 3 plus PTH and PO4

Model 3b: adjusted covariates in model 3, excluding subjects with Ca>10.3 mg/dL and PTH>65 pg/ml (n=9)
